# Supplementary material
Source: PubMed Central journal article supplement (PMC2931609)
Supplement: supp_123_18_3177__2.pdf [file supp_123_18_3177__2.pdf]

Table S1. Rescue of *slpr* mutants to adulthood by ubiquitous expression of transgene variants

| <i>slpr</i> <sup>*</sup> / <i>FM7</i> ;<br><i>armG4</i> × <i>UAS-Tg</i> | <i>slpr</i> <sup><i>BS06</i></sup> / <i>Y</i> | <i>FM7</i> / <i>Y</i> | Relative<br>eclosion‡ | <i>slpr</i> <sup><i>g21</i></sup> / <i>Y</i> | <i>FM7</i> / <i>Y</i> | Relative<br>eclosion | <i>slpr</i> <sup><i>3P5</i></sup> / <i>Y</i> | <i>FM7</i> / <i>Y</i> | Relative<br>eclosion |
|-------------------------------------------------------------------------|-----------------------------------------------|-----------------------|-----------------------|----------------------------------------------|-----------------------|----------------------|----------------------------------------------|-----------------------|----------------------|
| <i>no Tg</i>                                                            | 20                                            | 396                   | <b>5%</b>             | 0                                            | 157                   | <b>0%</b>            | 0                                            | 52                    | <b>0%</b>            |
| <i>Slpr WT</i>                                                          | 192                                           | 137                   | <b>140%</b>           | 44                                           | 25                    | <b>176%</b>          | 14                                           | 21                    | <b>67%</b>           |
| <i>Slpr WT HA</i>                                                       | 228                                           | 421                   | <b>54%</b>            | 62                                           | 300                   | <b>21%</b>           | 44                                           | 194                   | <b>23%</b>           |
| <i>Slpr AAA</i>                                                         | 0                                             | 257                   | <b>0%</b>             | 0                                            | 236                   | <b>0%</b>            | 0                                            | 156                   | <b>0%</b>            |
| <i>Slpr TAA</i>                                                         | 6                                             | 325                   | <b>2%</b>             | 0                                            | 290                   | <b>0%</b>            | 0                                            | 256                   | <b>0%</b>            |
| <i>Slpr ASA</i>                                                         | 1                                             | 445                   | <b>0%</b>             | 0                                            | 385                   | <b>0%</b>            | 0                                            | 312                   | <b>0%</b>            |
| <i>Slpr AAT</i>                                                         | 17                                            | 264                   | <b>6%</b>             | 5                                            | 282                   | <b>2%</b>            | 2                                            | 220                   | <b>1%</b>            |
| <i>SKLC WT</i>                                                          | 68                                            | 272                   | <b>25%</b>            | 46                                           | 176                   | <b>26%</b>           | 2                                            | 215                   | <b>1%</b>            |
| <i>SKLC AAA</i>                                                         | 5                                             | 383                   | <b>1%</b>             | 2                                            | 282                   | <b>1%</b>            | 1                                            | 264                   | <b>0%</b>            |
| <i>Cterm</i>                                                            | 7                                             | 320                   | <b>2%</b>             | 0                                            | 339                   | <b>0%</b>            | 0                                            | 246                   | <b>0%</b>            |
| <i>SH3</i>                                                              | 2                                             | 284                   | <b>1%</b>             | 0                                            | 254                   | <b>0%</b>            | 0                                            | 172                   | <b>0%</b>            |
| $\Delta$ <i>SH3</i>                                                     | 17                                            | 98                    | <b>17%</b>            | 0                                            | 10                    | <b>0%</b>            | 0                                            | 0                     | †                    |
| <i>Slpr AVA</i>                                                         | 0                                             | 0                     | †                     | 0                                            | 0                     | †                    | 0                                            | 0                     | †                    |

‡ equals # *slpr*<sup>*BS06*</sup> males/ # *FM7* males expressed as a percentage

† lethality, no adults recovered
