# Supplementary material
Source: PubMed Central journal article supplement (PMC2931609)
Supplement: supp_123_18_3177__3.pdf [file supp_123_18_3177__3.pdf]

Table S2. Number of embryos with indicated cuticle phenotype

| <i>gt<sup>X11</sup> spr<sup>921</sup>/FM7;</i><br><i>armG4 × UAS-Tg</i> | <i>gt<sup>+</sup></i> |           | <i>gt<sup>-</sup></i> |             |         | total N |
|-------------------------------------------------------------------------|-----------------------|-----------|-----------------------|-------------|---------|---------|
|                                                                         | wildtype              | severe DO | severe DO             | moderate DO | mild DO |         |
| <i>Slpr WT HA</i>                                                       | 5                     | 0         | 1                     | 4           | 11      | 21      |
| <i>SKLC AAA</i>                                                         | 1                     | 6         | 16                    | 0           | 1       | 24      |
| <i>_SH3</i>                                                             | 5                     | 0         | 2                     | 5           | 5       | 17      |
| <i>SKLC WT</i>                                                          | 2                     | 0         | 9                     | 8           | 16      | 35      |
| <i>Cterm</i>                                                            | 2                     | 0         | 29                    | 3           | 1       | 35      |
| <i>SH3</i>                                                              | 3                     | 0         | 15                    | 0           | 0       | 18      |
