# Supplementary material
Source: PubMed Central journal article supplement (PMC2931609)
Supplement: supp_123_18_3177__4.pdf [file supp_123_18_3177__4.pdf]

Table S3. Number of *gt* mutant embryos that are also severe dorsal open (DO)

| <i>gt</i> <sup>X11</sup> <i>slpr</i> <sup>921</sup> / <i>FM7</i> ;<br><i>armG4</i> × <i>UAS-Tg</i> | <i>gt</i> , severe DO (N <i>gt</i> ) |
|----------------------------------------------------------------------------------------------------|--------------------------------------|
| <i>Slpr</i> WT HA                                                                                  | 1 (16)                               |
| _SH3                                                                                               | 2 (12)                               |
| <i>SKLC</i> WT                                                                                     | 9 (33)                               |
| <i>Cterm</i>                                                                                       | 29 (33)                              |
| <i>SKLC</i> AAA                                                                                    | 16 (17)                              |
| <i>SH3</i>                                                                                         | 15 (15)                              |
