# Supplementary material
Source: PubMed Central journal article supplement (PMC2931609)
Supplement: supp_123_18_3177__5.pdf [file supp_123_18_3177__5.pdf]

Table S4. Oligonucleotide primers used in this study

| Construct   | SOEing Primers 1 <sup>st</sup> Product                         | SOEing Primers 2 <sup>nd</sup> Product | Primers Final Product |
|-------------|----------------------------------------------------------------|----------------------------------------|-----------------------|
| SKLC WT     |                                                                |                                        | F: T3<br>R: CRCRIBr   |
| SH3         |                                                                |                                        | F: XhHi<br>R: CRSH3r  |
| Slpr AAA    | F: XhHi<br>R: AAAr                                             | F: AA Af<br>R: BSKINr                  | F: XhHi<br>R: BSKINr  |
| Slpr TAA    | F: XhHi<br>R: TAAr                                             | F: TAAf<br>R: BSKINr                   | F: XhHi<br>R: BSKINr  |
| Slpr ASA    | F: XhHi<br>R: ASAr                                             | F: AS Af<br>R: BSKINr                  | F: XhHi<br>R: BSKINr  |
| Slpr AAT    | F: XhHi<br>R: AATr                                             | F: AATf<br>R: BSKINr                   | F: XhHi<br>R: BSKINr  |
| Slpr AVA    | F: F7<br>R: PAr                                                | F: P Af<br>R: R7                       | F: F7<br>R: R7        |
| ΔSH3        | F: T7<br>R: Ar                                                 | F: Df<br>R: BSKINr                     | F: T7<br>R: BSKINr    |
| Cterm       | F: T7<br>R: Fr                                                 | F: Ef<br>R: R10                        | F: T7<br>R: R10       |
| Primer name | Sequence 5'>3'                                                 |                                        |                       |
| CRCRIBr     | GAT GCG GAA TTC GGA GAA GGA AGG                                |                                        |                       |
| CRSH3r      | GAT GTC GCC GAA TTC GGA CGA GAC                                |                                        |                       |
| AA Af       | GAT GTA CAA CGC GCA GAG GAT GGC TGC GGC GGG CGC GTA CGC TTG G  |                                        |                       |
| AA Ar       | CCA AGC GTA CGC GCC CGC CGC AGC CAT CCT CTG CGC GTT GTA CAT C  |                                        |                       |
| XhHi        | GAG GTC GAC GGT ATC GAT AAG C                                  |                                        |                       |
| BSKINr      | GAT CGA AAT CCT GCA TGT AGT GAA ACG AC                         |                                        |                       |
| TAAf        | CGC AGA GGA TGG CTG CGG CGG GCG CGT ACG CTT GG                 |                                        |                       |
| TAAr        | CCA AGC GTA CGC GCC CGC CGC AGC CAT CCT CTG CG                 |                                        |                       |
| AS Af       | GAT GTA CAA CGC GCA GAG GAT GAG TGC GGC GGG CGC GTA CGC TTG G  |                                        |                       |
| AS Ar       | CCA AGC GTA CGC GCC CGC CGC ACT C AT CCT CTG CGC GTT GTA CAT C |                                        |                       |
| AATf        | GAT GTA CAA CGC GCA GAG GAT GGC TGC GGC GGG C                  |                                        |                       |
| AATr        | GCC CGC CGC ACG CAT CCT CTG CGC GTT GTA CAT C                  |                                        |                       |
| F7          | GTA CGC TTG GAT GCC ACC GG                                     |                                        |                       |
| R7          | GTG ATG GCT TTA CAA TTG CC                                     |                                        |                       |
| PAf         | CAT GTT GCA GGC GGT GGC ATC GAA ACG C                          |                                        |                       |
| PAr         | GCG TTT CGA TGC CAC CGC CTG CAA CAT G                          |                                        |                       |
| T7          | TAA TAC GAC TCA CTA GGG                                        |                                        |                       |
| Ar          | GAC ATT CAG CAT GTT GGT GGT GTC C                              |                                        |                       |
| Df          | ACC AAC ATG CTG AAT GTC TCG TCC G                              |                                        |                       |
| Fr          | CCG CTG GTG CAT GTT GGT GGT GTC C                              |                                        |                       |
| Ef          | ACC AAC ATG CAC CAG CGG GAG CG                                 |                                        |                       |
| R10         | GCT GAT AAG CAA GCG GAT GAT C                                  |                                        |                       |

F: Forward  
R: Reverse
