# Supplementary material
Source: PubMed Central journal article supplement (PMC2931609)

*pnr-G4, puc<sup>E69</sup> > UAS-Tg*

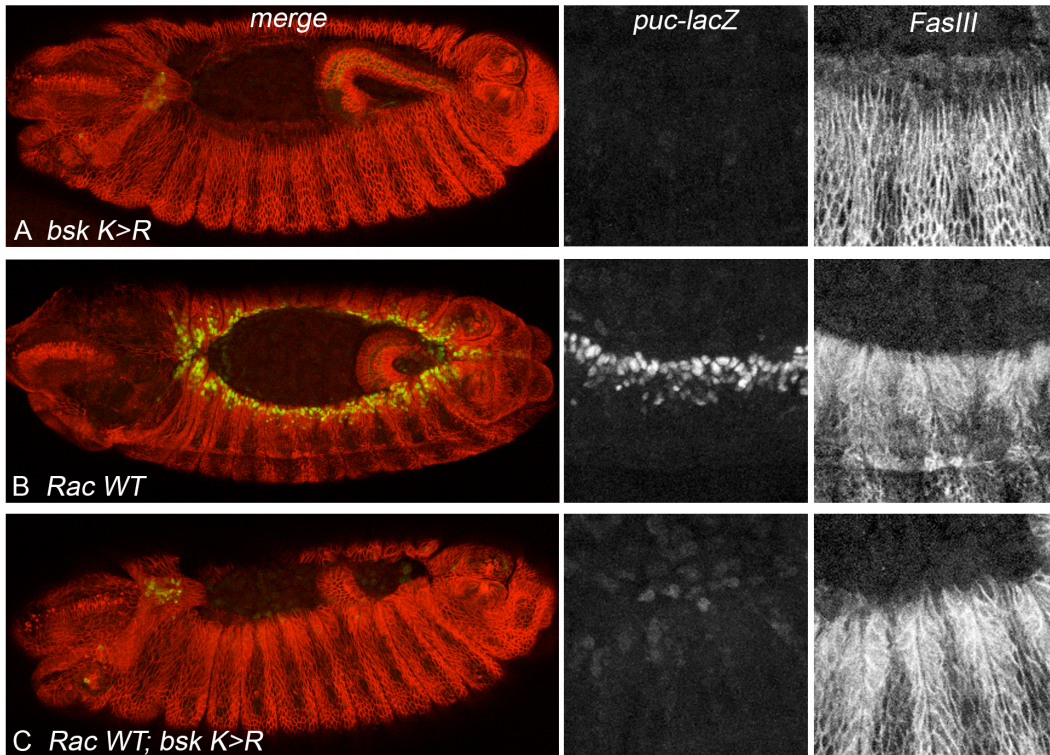

Supplement: supp_123_18_3177__1.pdf [file supp_123_18_3177__1.pdf]
